# Supplementary material
Source: PubMed Central journal article supplement (PMC3296832)
Supplement: NIHMS349704-supplement-Supp_Fig_S1.pdf [file NIHMS349704-supplement-Supp_Fig_S1.pdf]

Supplemental figure 1

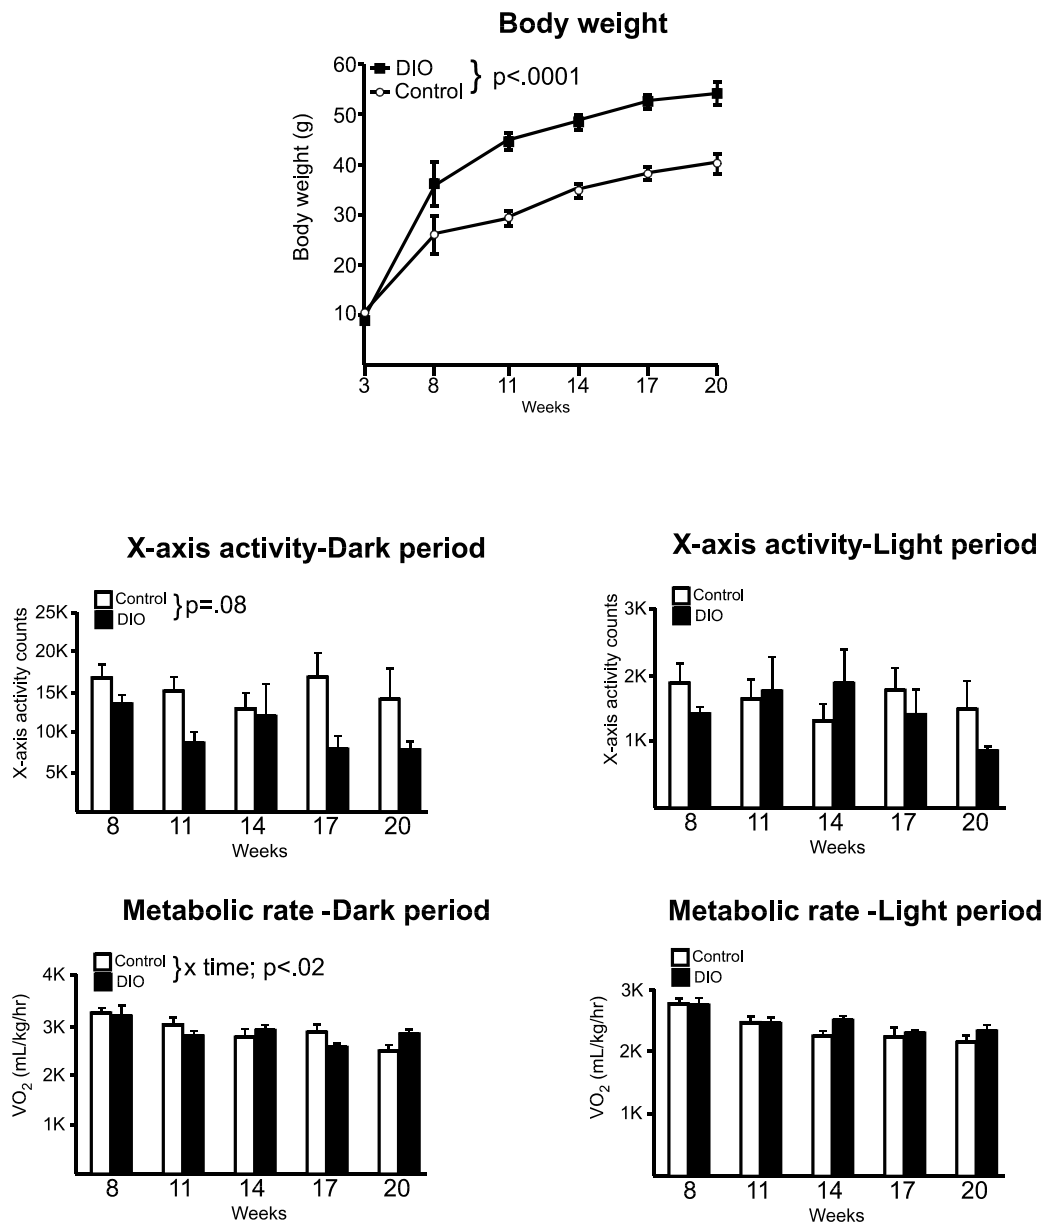

Supplemental Figure 1 legend.

(A) Control and DIO mice did not differ in weight at weaning, but the DIO mice fed the HF diet gained significantly more weight over the duration of the study. (B) X-axis activity did not differ in the dark or the light period between control and DIO mice (although there was a slight trend towards decreased activity in the DIO mice in the dark). (C) The decrease in metabolism over time was different between the two groups, indicated by a significant interaction in the two-way ANOVA.
